# Supplementary material for: The Role of Salmonella Genomic Island 4 in Metal Tolerance of Salmonella enterica Serovar I 4,[5],12:i:- Pork Outbreak Isolate USDA15WA-1
Source: MDPI journal article supplement (doi:10.3390/genes11111291), 2020-10-30
Supplement: s1 [file s1]

**Table S3.** Gene expression read counts.

| <b>Samples</b>   | <b>Total No. reads<br/>sequenced</b> | <b>No. of reads<br/>aligned</b> | <b>No. of reads<br/>failed to align</b> | <b>Uniquely<br/>aligned reads</b> | <b>Multi-aligned<br/>reads</b> |
|------------------|--------------------------------------|---------------------------------|-----------------------------------------|-----------------------------------|--------------------------------|
| SX240_CON_M30_R1 | 28,585,903                           | 23,398,788                      | 5,187,115                               | 13,779,926                        | 9,618,862                      |
| SX240_CON_M30_R2 | 26,665,731                           | 23,096,107                      | 3,569,624                               | 19,555,700                        | 3,540,407                      |
| SX240_CON_M30_R3 | 26,928,218                           | 22,240,032                      | 4,688,186                               | 21,934,979                        | 305,053                        |
| SX240_CON_M60_R1 | 29,426,533                           | 24,367,125                      | 5,059,408                               | 10,503,641                        | 13,863,484                     |
| SX240_CON_M60_R2 | 26,446,499                           | 22,745,698                      | 3,700,801                               | 22,540,464                        | 205,234                        |
| SX240_CON_M60_R3 | 32,587,608                           | 26,218,032                      | 6,369,576                               | 24,584,417                        | 1,633,615                      |
| SX240_CUP_M30_R1 | 28,848,728                           | 24,904,304                      | 3,944,424                               | 23,488,242                        | 1,416,062                      |
| SX240_CUP_M30_R2 | 26,105,786                           | 21,768,495                      | 4,337,291                               | 20,218,795                        | 1,549,700                      |
| SX240_CUP_M30_R3 | 30,157,072                           | 25,176,079                      | 4,980,993                               | 24,993,047                        | 183,032                        |
| SX240_CUP_M60_R1 | 36,911,048                           | 31,448,428                      | 5,462,620                               | 30,286,956                        | 1,161,472                      |
| SX240_CUP_M60_R2 | 27,202,952                           | 23,256,938                      | 3,946,014                               | 23,081,075                        | 175,863                        |
| SX240_CUP_M60_R3 | 34,754,202                           | 29,416,076                      | 5,338,126                               | 29,141,637                        | 274,439                        |
