# Supplementary material for: The Role of Salmonella Genomic Island 4 in Metal Tolerance of Salmonella enterica Serovar I 4,[5],12:i:- Pork Outbreak Isolate USDA15WA-1
Source: MDPI journal article supplement (doi:10.3390/genes11111291), 2020-10-30
Supplement: s1 [file s1]

**Table S1.** PCR Primers for Recombineering.

| Primer                    | Sequence*                                                                                    | Target             |
|---------------------------|----------------------------------------------------------------------------------------------|--------------------|
| <b>oBBI</b><br><b>528</b> | 5' Phos-<br><b>GATGAGATCCTTAACGGGCGGAAAATGCAGGGTCCGGTCATAC</b> <u>GATAGCTGAATGAGTGACGTGC</u> | SGI-4<br>deletion  |
| <b>oBBI</b><br><b>529</b> | 5'<br><b>GCTACGGATTTCATTCCCAGAAAAGCAAAAACCCAGCCATAGGC</b> <u>CATAGAGCAGTGACGTAGTCGC</u>      | SGI-4<br>deletion  |
| <b>oBBI</b><br><b>542</b> | 5'<br><b>CACGATGGTGGGAACGATAAAAAAATTAATTCGGCAAACGGGG</b> <u>CATAGAGCAGTGACGTAGTCGC</u>       | SGI-4<br>insertion |
| <b>oBBI</b><br><b>543</b> | 5'<br><b>GAGACTACGAACGATACCTGGACTGATAACGGGACCGCGACGCG</b> <u>CATAGCTGAATGAGTGACGTGC</u>      | SGI-4<br>insertion |

\*Bold text indicates homology to the target gene and underlined text indicates homology to oBBI 92/93-*neo* for PCR amplification of the linear knockout fragment.
