# Supplementary material for: The Role of Salmonella Genomic Island 4 in Metal Tolerance of Salmonella enterica Serovar I 4,[5],12:i:- Pork Outbreak Isolate USDA15WA-1
Source: MDPI journal article supplement (doi:10.3390/genes11111291), 2020-10-30
Supplement: s1 [file s1]

**Table S7.** Results of the PERMANOVA tests comparing microbial community structure between Zn+Cu and Control groups.

| Comparison                                            | F.Model | R2    | P value | P FDR | Day | Sample         |
|-------------------------------------------------------|---------|-------|---------|-------|-----|----------------|
| D0 feces Control vs D0 feces ZnCu                     | 1.97    | 0.099 | 0.035   | 0.056 | 0   | Feces          |
| D2 feces Control vs D2 feces ZnCu                     | 1.32    | 0.068 | 0.176   | 0.201 | 2   | Feces          |
| D7 feces Control vs D7 feces ZnCu                     | 1.29    | 0.067 | 0.215   | 0.215 | 7   | Feces          |
| D14 feces Control vs D14 feces ZnCu                   | 1.32    | 0.068 | 0.164   | 0.201 | 14  | Feces          |
| D21 feces Control vs D21 feces ZnCu                   | 2.93    | 0.14  | 0.002   | 0.016 | 21  | Feces          |
| D21 ileum mucosa Control vs D21 ileum mucosa ZnCu     | 3.17    | 0.165 | 0.004   | 0.016 | 21  | Ileum mucosa   |
| D21 cecum mucosa Control vs D21 cecum mucosa ZnCu     | 2.56    | 0.124 | 0.02    | 0.04  | 21  | Cecum mucosa   |
| D21 cecal contents Control vs D21 cecal contents ZnCu | 2.51    | 0.122 | 0.018   | 0.04  | 21  | Cecal contents |

The PERMANOVA tests (detailed above) suggest that the microbial communities in Zn+Cu fed pigs differed significantly from the microbial communities present in Control animals in all tissues at Day 21. In addition prior to Salmonella infection (Day 0) there was a nearly significant difference in the microbial communities between the two groups. PERMANOVA tests were conducted on Bray-Curtis dissimilarities which were derived from rarefied OTU tables. P values were corrected by the FDR method considering all tests that were performed.
